# Supplementary figures and images for: A novel layered and pillared topology in a 3D open framework: synthesis, crystal structure and magnetic propertiesElectronic supplementary information (ESI) available: Fig. S1: showing the brick-walled shaped view of the [{Cu3(malonate)2(H2O)2}]n layer; Fig. S2: space-filled diagram showing channels viewed down x-axis. See http://www.rsc.org/suppdata/nj/b2/b208650f/
Source: Royal Society of Chemistry journal article supplement (doi:10.1039/b208650f), 2002-12-12

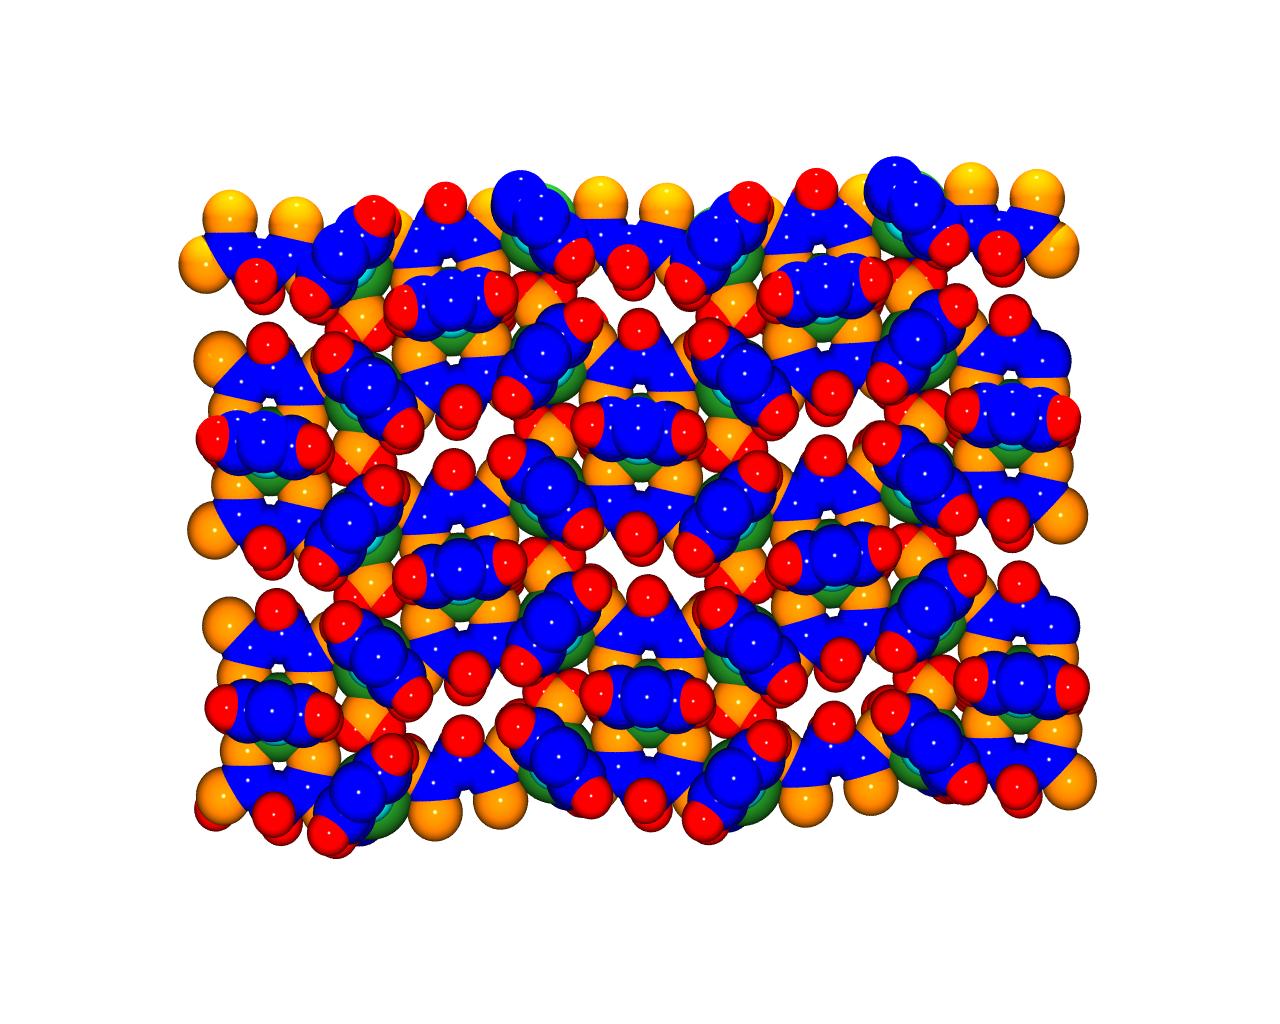
 **Supplementary figure** **Fig. S2** Space-filled diagram showing channels viewed down X-axis.

Supplement: b208650fb.doc [file b208650fb.doc]
